# Supplementary material
Source: publisher figshare collection journal article supplement (https://future-science-group.figshare.com/ndownloader/files/30793243)
Supplement: Supplementary file 1 [file 30793243]

**Attached Table** Aberrantly expressed long non-coding RNAs (lncRNAs) in peripheral blood mononuclear cells (PBMCs) from patients with SZ versus healthy controls assessed via microarray analysis.

| LncRNA | Fold-change | P-value | Style | Chromosome start end |
| --- | --- | --- | --- | --- |
| AK096174 | 3.604943803 | 0.0016008046204167 | down | chr12 122232715 122234935 |
| AK123097 | 12.02781651 | 1.15517819559798E-07 | up | chr3 45118040  45120487 |
| DB340248 | 3.588188888 | 0.0171548587901834 | down | Chr8 140120891  140121447 |
| uc011dma.1 | 4.271437559 | 0.000320137082091749 | down | Chr6 29760374  29763298 |
| ENST00000509804-1 | 8.120558314 | 6.71204406341348E-08 | up | Chr19 55670306  55688908 |
| ENST00000509804-2 | 8.120558314 | 6.71204406341348E-08 | up | Chr19 55670306  55688908 |

* represents *P*<0.05
